# Supplementary material for: Coupled defect chemistry and redox dynamics in a bismuth gahnite system for self-adaptive tribological interfaces
Source: Royal Society of Chemistry journal article supplement (doi:10.1039/d5ta07478a), 2025-12-15
Supplement: d5ta07478a1.pdf [file d5ta07478a1.pdf]

**Electronic Supplementary Information**

**Coupled Defect Chemistry and Redox dynamics in Bismuth Gahnite**

**System for Self-Adaptive Tribological Interfaces**

Saithathul Fathima Sameera, <sup>†a</sup> Najiya Nasirin, <sup>†a</sup> Dalaver H Anjum, <sup>b</sup> Sheik Muhammadhu

Aboobakar Shibli<sup>\*a,c</sup>

<sup>a</sup> Department of Chemistry, University of Kerala, Kariavattom Campus, Thiruvananthapuram,  
Kerala – 695 581, India

<sup>b</sup> Physics Department, Khalifa University, Abu Dhabi 127788, United Arab Emirates

<sup>c</sup> Centre for Renewable Energy and Materials, University of Kerala, Kariavattom Campus,  
Thiruvananthapuram- Kerala – 695 581, India

<sup>†</sup> These authors contributed equally to this work and share first authorship

Corresponding Author: \*E-mail address: smashibli@yahoo.com

(Sheik Muhammadhu Aboobakar Shibli)

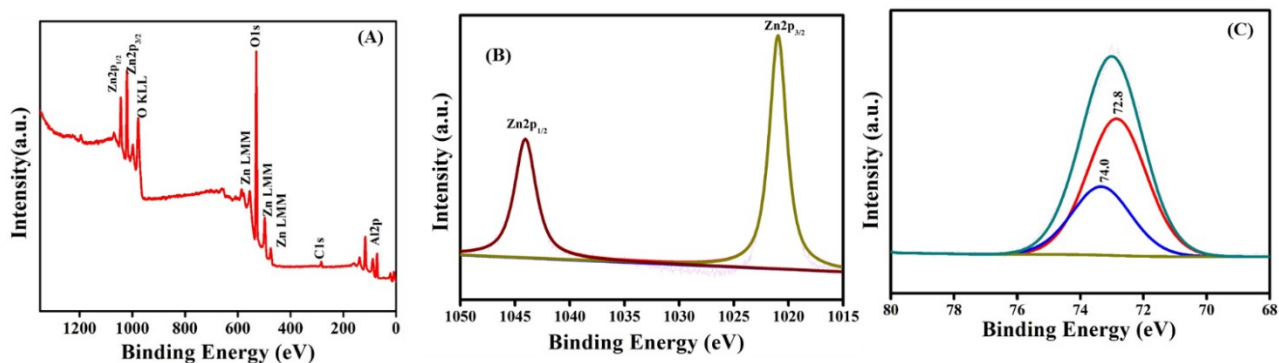

**Fig. S1** (A) XPS survey spectrum of ZA, high resolution images of (B) Zn2p (C) Al2p

The presence of Zn atoms in the oxidized state  $\text{Zn}^{2+}$  ion is confirmed by the Zn 2p core level spectrum's two BE peaks, which are centered at 1020.8 eV and 1043.9 eV, respectively, and correspond to doublets Zn 2p<sub>3/2</sub> and Zn 2p<sub>1/2</sub>.<sup>1</sup>

It is evident that the Al 2p peak is made up of a single peak that is located at 72.8 and 74.0 eV, respectively. The octahedral location of Al in the  $\text{ZnAl}_2\text{O}_4$  lattice, or Al in the  $\text{AlO}_6$  octahedra, is the source of this peak.<sup>2</sup>

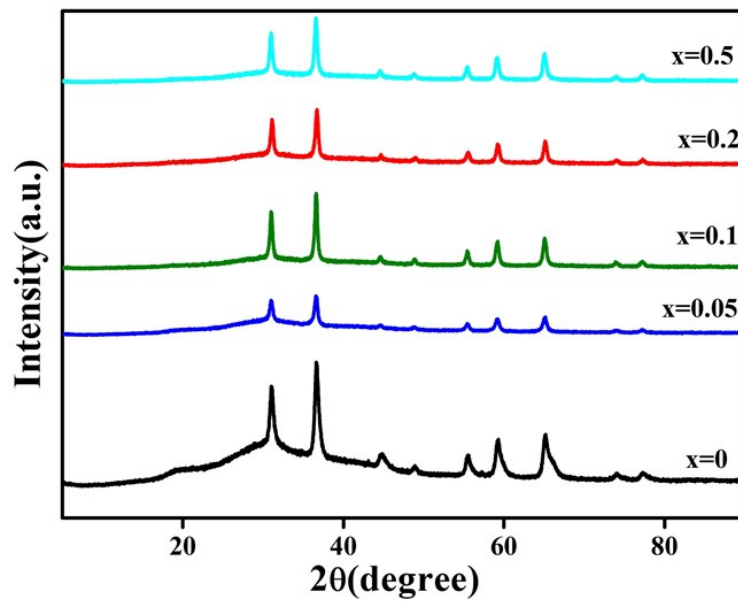

**Fig. S2** Stacked XRD spectra of all prepared samples

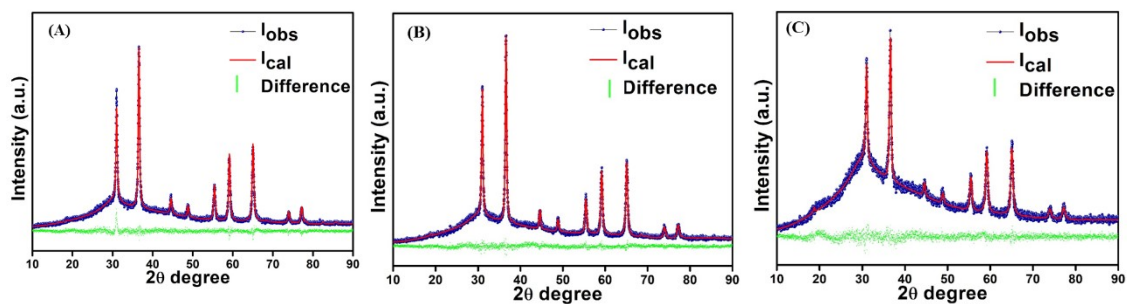

**Fig. S3** Graphical output of the Rietveld refinement of (A)  $ZAB_{0.05}$  (B)  $ZAB_{0.10}$  (C)  $ZAB_{0.50}$

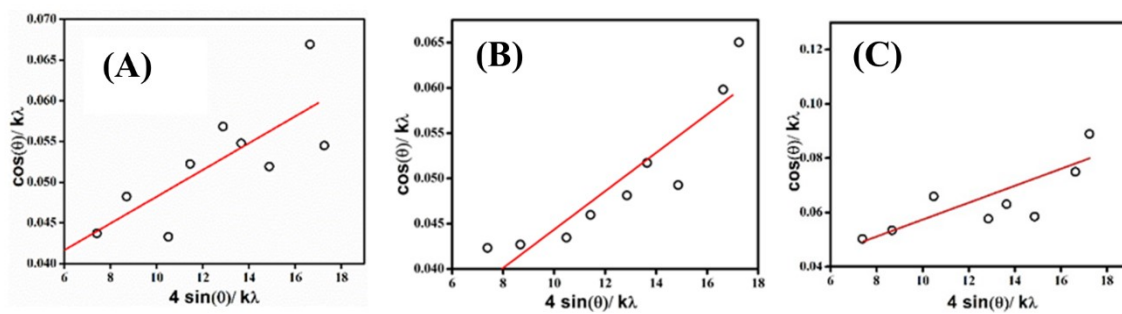

**Fig. S4** W-H plot of (A)  $ZAB_{0.05}$  (B)  $ZAB_{0.10}$  (C)  $ZAB_{0.50}$

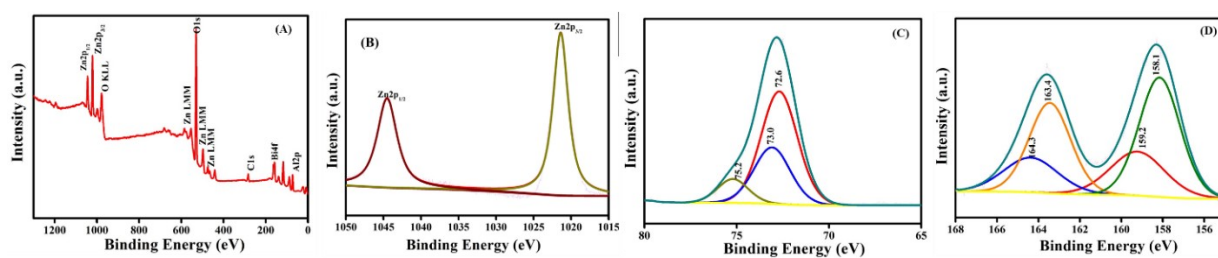

**Fig. S5** (A) XPS Survey spectra of ZAB<sub>0.20</sub>, High resolution spectra of (B) Zn 2p (C) Al 2p (D) Bi 4f

Bi 4f fine scan spectrum deconvolute into four peaks. The Bi 4f<sub>5/2</sub> and Bi 4f<sub>7/2</sub> of positively charged Bi species (Bi<sup>3+</sup>) are responsible for the two peaks at 164.4 and 159.1 eV, whereas the Bi 4f<sub>5/2</sub> and Bi 4f<sub>7/2</sub> of metallic Bi (Bi<sup>0</sup>) are responsible for the other two peaks at 162.7 and 157.3 eV.<sup>3</sup>

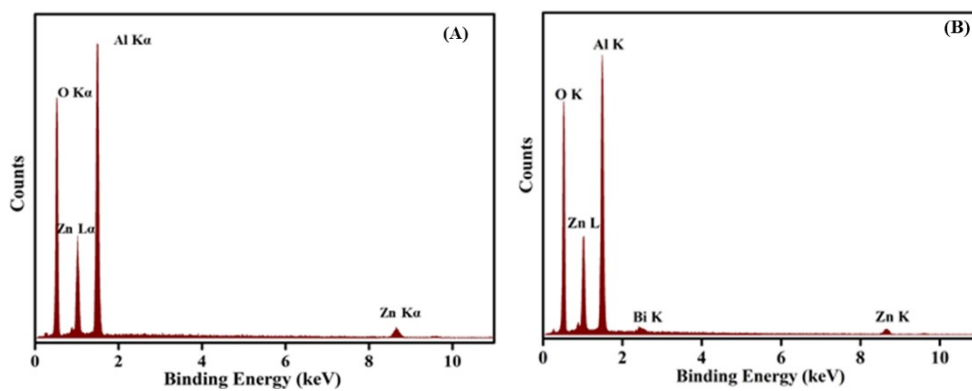

**Fig. S6** EDX spectrum of (A) ZA (B) ZAB<sub>0.20</sub>

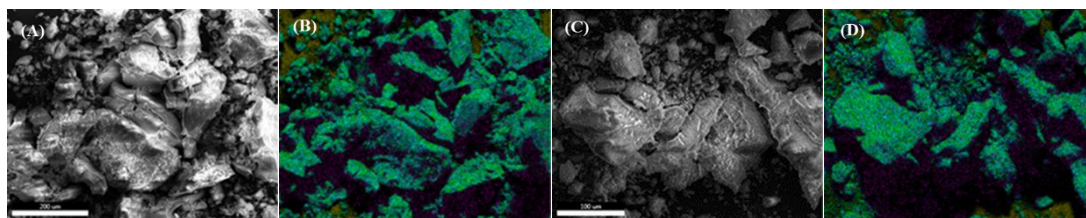

**Fig. S7** (A) Selected Area for mapping of ZA, (B) Element overlay of ZA, (C) Selected Area for mapping of ZAB<sub>0.20</sub> (D) Element overlay of ZAB<sub>0.20</sub>

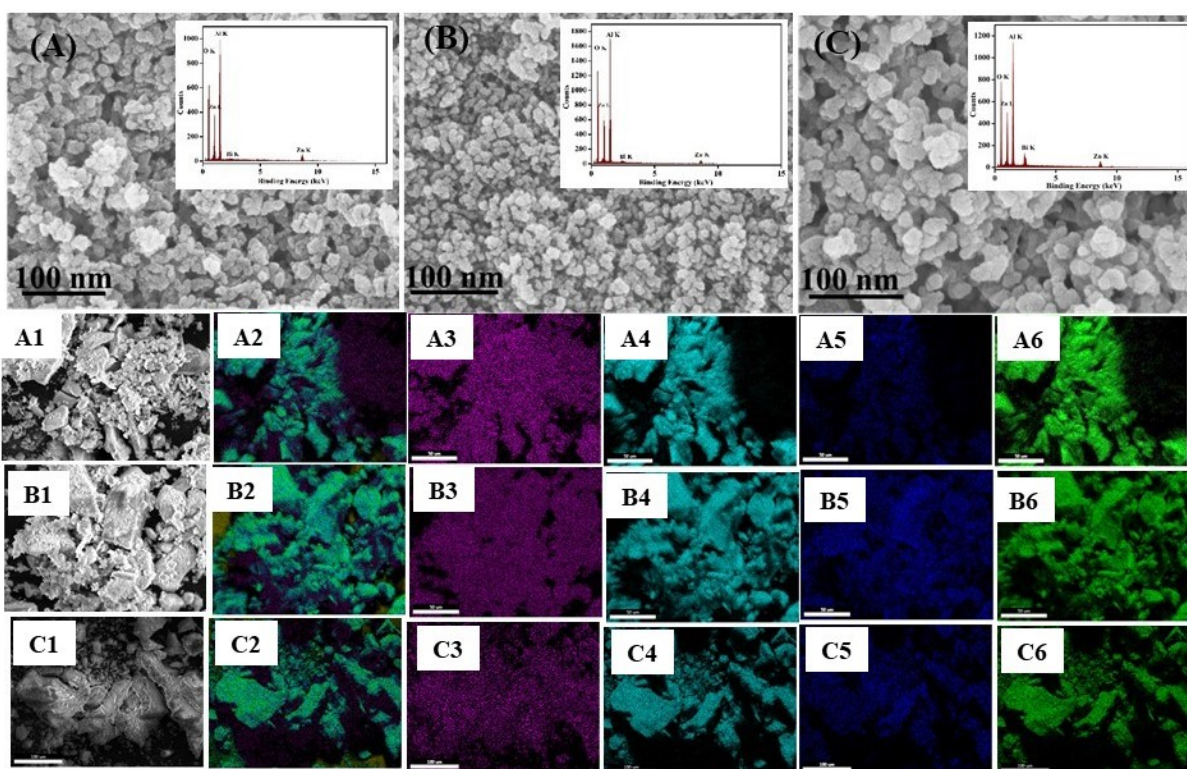

**Fig. S8** FESEM micrographs of (A) ZAB<sub>0.05</sub> (B) ZAB<sub>0.10</sub> (C) ZAB<sub>0.50</sub>, inset showing corresponding EDX spectra and corresponding mapping of (A1-C1), (A2-C2), (A3-C3). (A4-C4), (A5-C5) & (A6-C6) are the selected area for EDX mapping, overlay of elements, Zn scan, Al scan, Bi scan and O scan respectively.

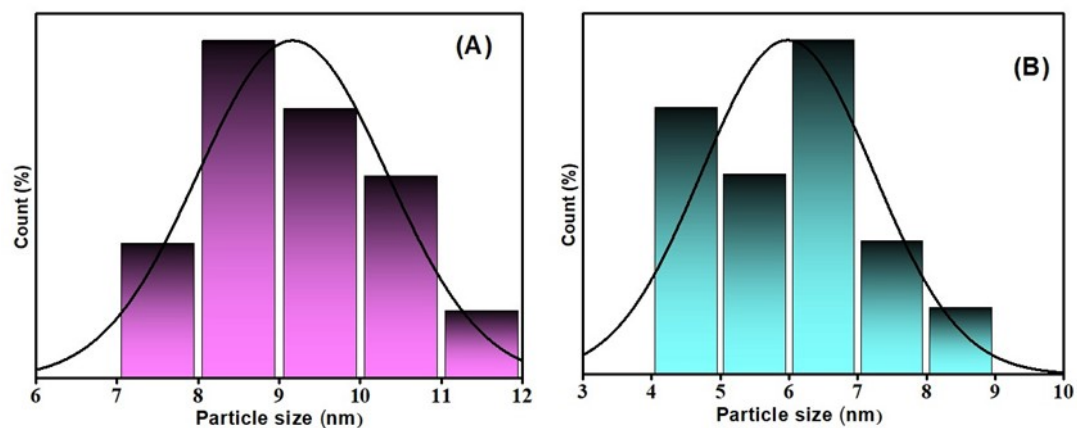

**Fig. S9** Histogram of particle size distribution from TEM measurement of (A) ZA and (B) ZAB<sub>0.2</sub>.

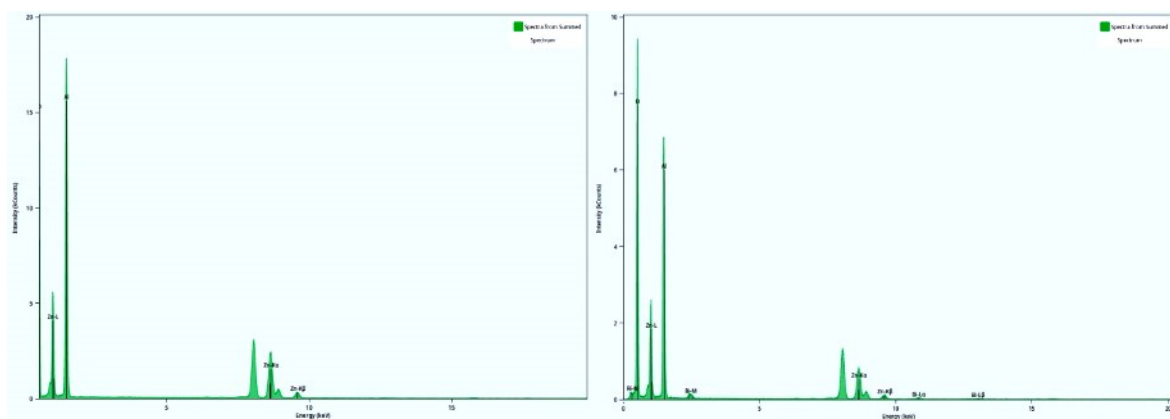

**Fig. S10** TEM-EDS elemental analysis (A) ZAB, (B) ZAB<sub>0.2</sub>

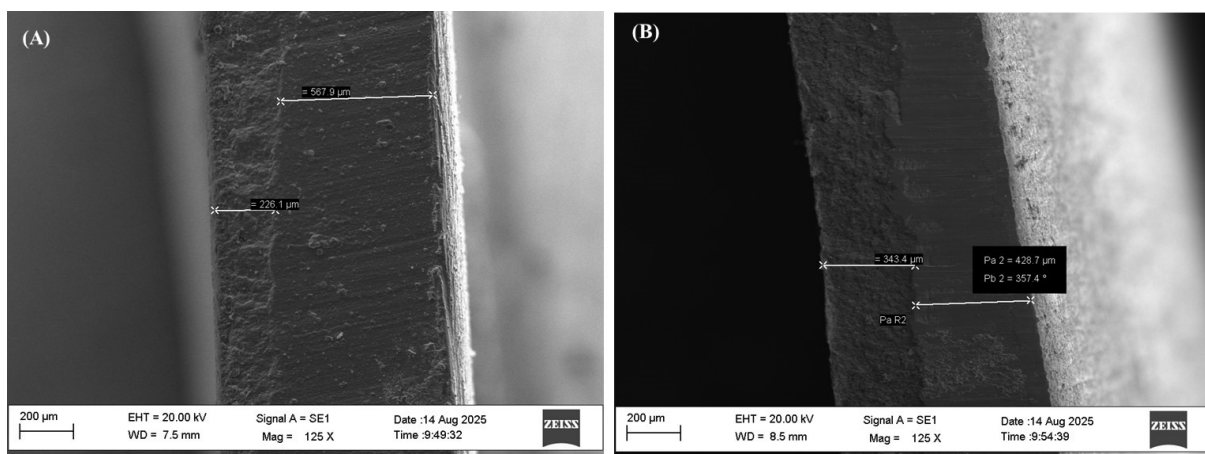

**Fig. S11** Cross sectional SEM images of (A) NiP (B) ZAB<sub>0.2</sub>@NiP



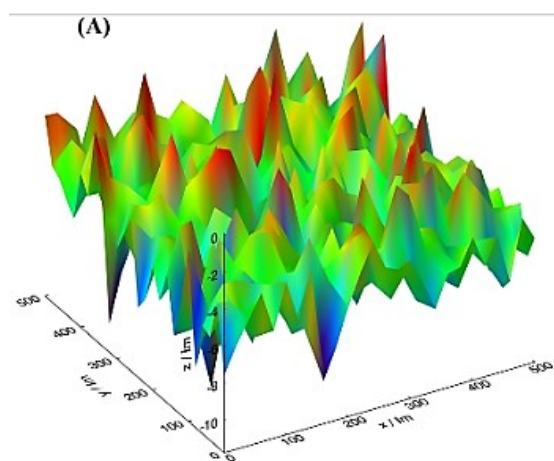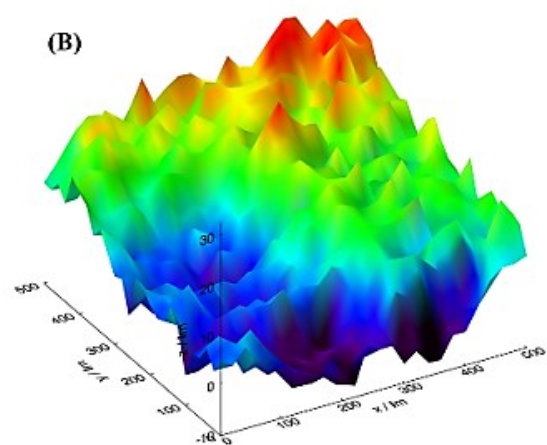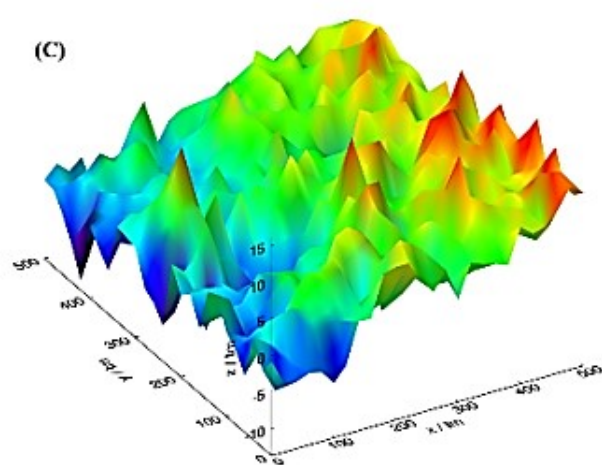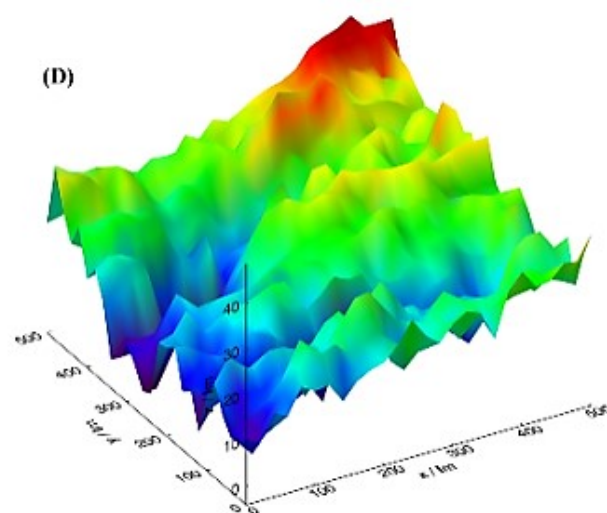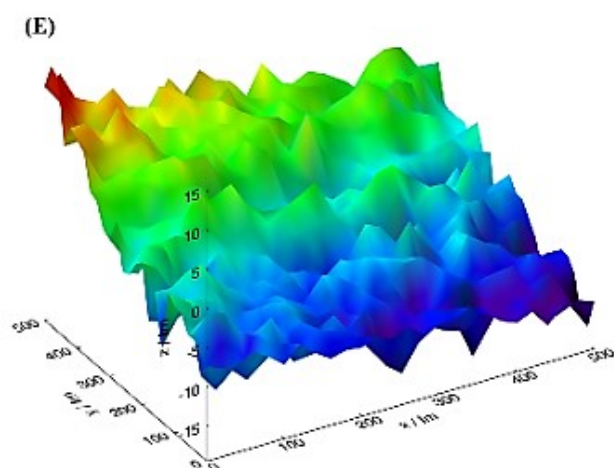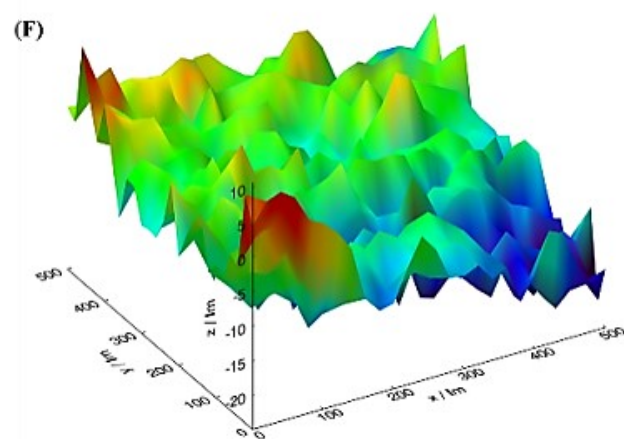



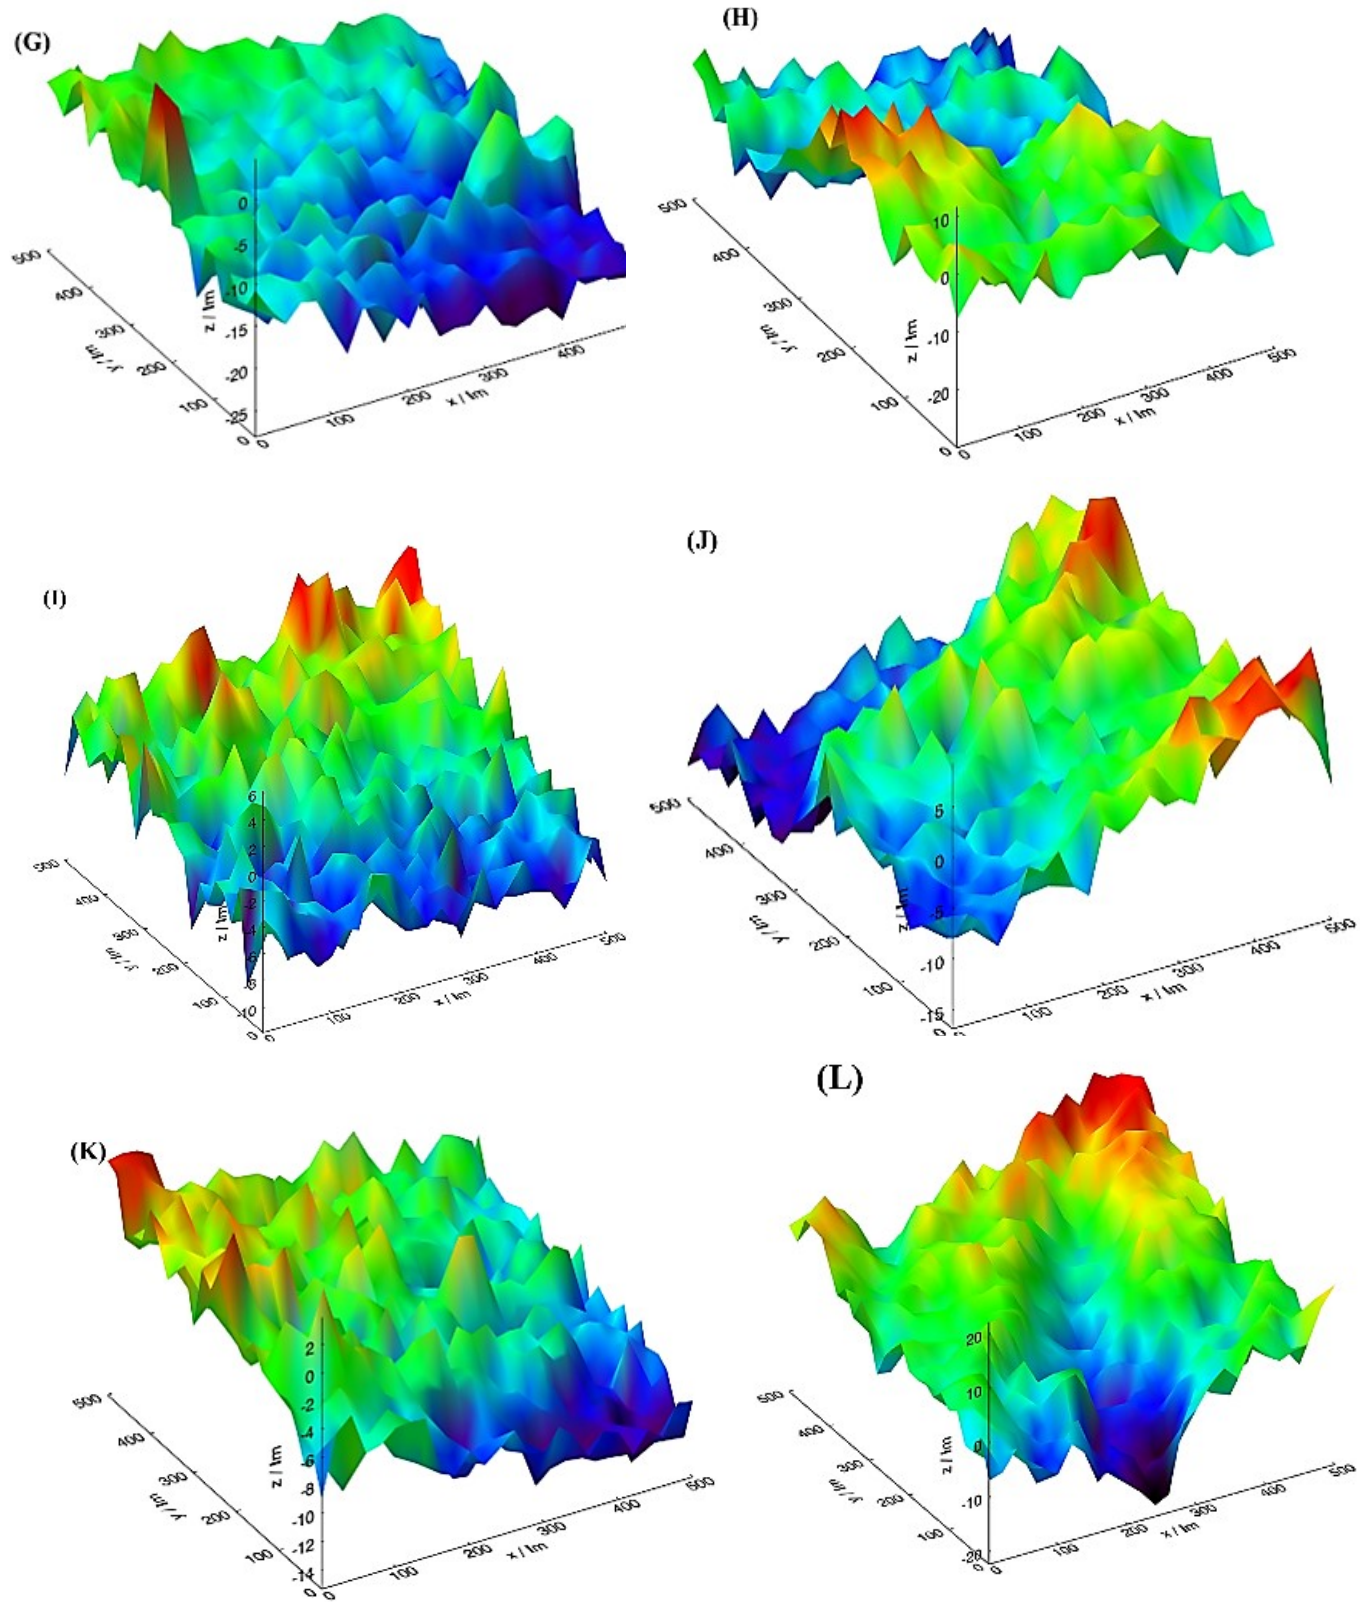

**Fig. S12** OSP Images of (A,C,E,G,I &K) Outside wear track of NiP, ZA, ZAB<sub>0.05</sub>, ZAB<sub>0.10</sub>, ZAB<sub>0.20</sub> & ZAB<sub>0.50</sub> and (B,D,F,H,J& L) inside wear track NiP, ZA, ZAB<sub>0.05</sub>, ZAB<sub>0.10</sub>, ZAB<sub>0.20</sub> & ZAB<sub>0.50</sub>

**Sa** Arithmetic average height of the surface ( $\mu\text{m}$ )

**Sq** root mean square height of the surface ( $\mu\text{m}$ )

**Ssk** Skewness of height distribution (dimensionless)

**Sku** Kurtosis of height distribution (dimensionless)

**Sp** maximum surface peak Height ( $\mu\text{m}$ )

**Sv** maximum valley depth ( $\mu\text{m}$ )

**St** maximum surface vertical peak-to-valley height ( $\mu\text{m}$ )

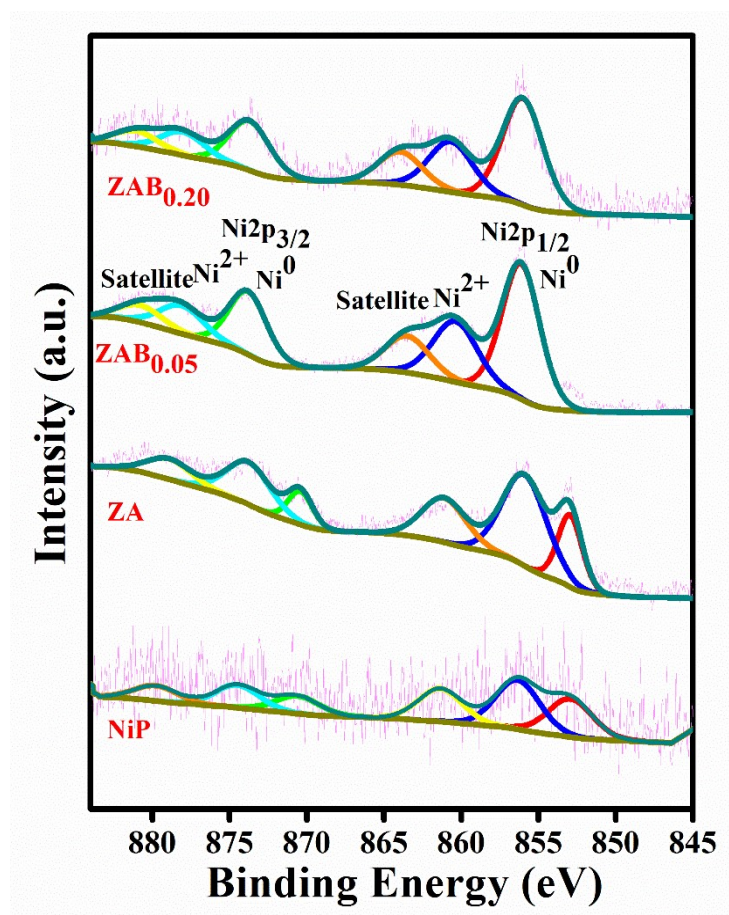

**Fig. S13** High resolution image of (A) Ni<sub>2</sub>p outside wear track

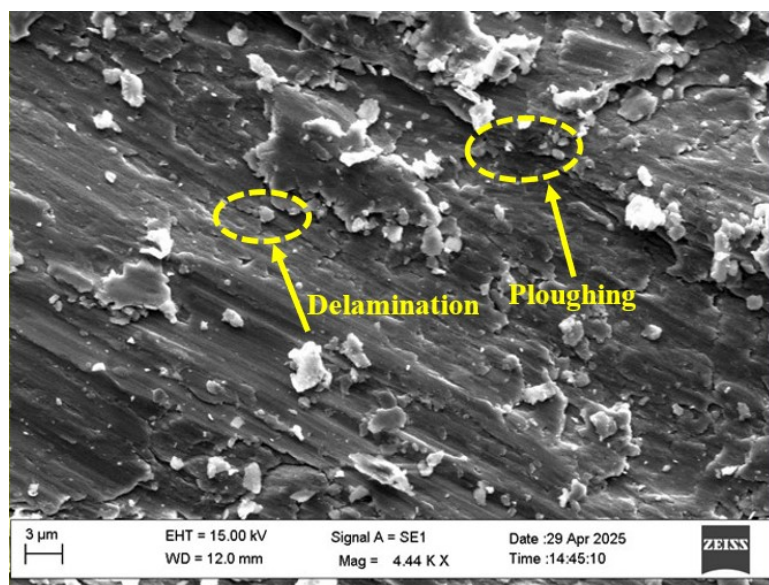

**Fig. S14 (A)** SEM image of ZAB<sub>0.5</sub> inside wear track

When the bismuth concentration increases to  $x=0.5$  in  $\text{ZnAl}_{2-x}\text{Bi}_x\text{O}_4$  in the ZAB<sub>0.5</sub>@NiP matrix, the excess bismuth starts segregating to grain boundaries and interfaces, where it forms weak Bi-rich intergranular layers. High-resolution studies in related systems have shown that such segregated Bi can reconstruct into bilayers or ordered interfacial phases with very low cohesive strength.<sup>4</sup> The alterations in the chemical state and crystal structure of zinc aluminate induced by bismuth changes the frictional behaviour, resulting in pronounced changes in frictional response during sliding.<sup>5</sup> At high concentrations of bismuth, the accumulation of bismuth atoms along grain boundaries can cause embrittlement, leading to metallurgical fracture.<sup>6</sup> These regions fracture readily during sliding, generating loose debris and prevents the development of a stable, protective tribofilm. From the SEM image (Fig.S14) of the ZAB<sub>0.5</sub> worn track, it is evident that fragmented particles, delamination, and discontinuous smearing has occurred. The brittle failure of these bismuth-rich zones and the formation of third-body debris lead to the observed rise in friction and wear (COF=0.70).

**Table S1.** Structure refinement values obtained by Rietveld refinement

| Samples                   | ZAB         | ZAB <sub>0.05</sub> | ZAB <sub>0.10</sub> | ZAB <sub>0.20</sub> | ZAB <sub>0.50</sub> |
|---------------------------|-------------|---------------------|---------------------|---------------------|---------------------|
| <b>a(Å)</b>               | 8.1446      | 8.1370              | 8.1326              | 8.1094              | 8.1416              |
| <b>V(Å)<sup>3</sup></b>   | 540.26      | 538.76              | 537.88              | 533.29              | 539.67              |
| <b>Space group</b>        | <i>Fd3m</i> | <i>Fd3m</i>         | <i>Fd3m</i>         | <i>Fd3m</i>         | <i>Fd3m</i>         |
| <b>R<sub>exp</sub>(%)</b> | 6.50        | 6.89                | 6.67                | 6.60                | 6.37                |
| <b>R<sub>wp</sub>(%)</b>  | 7.35        | 8.00                | 7.70                | 9.02                | 7.13                |
| <b>R<sub>p</sub>(%)</b>   | 5.63        | 6.18                | 5.74                | 7.06                | 5.41                |
| <b>GOF</b>                | 1.13        | 1.16                | 1.15                | 1.37                | 1.12                |

R<sub>exp</sub> represents the statistically expected R-factor based on data quality and number of refinable parameters. It provides a reference to compare the achieved fit.

R<sub>wp</sub> -The difference between the calculated and actual diffraction intensity is termed as the weighted profile residual factor.

R<sub>p</sub> measures the discrepancy between the observed and calculated diffraction profiles. Lower R<sub>p</sub> indicates better agreement.

Goodness of fit (GOF) is used as a metric to evaluate the optimised Rietveld refinement results which is defined as follows:

$$\text{GOF} = \frac{\sum_i \omega_i (y_i^{\text{Obs}} - y_{x,i}^{\text{Calc}})^2}{N_{\text{obs}} - p}$$

where  $x$  represents a fixed parameter configuration of Rietveld refinement including the scope of the refinement,  $y_i^{\text{Obs}}$  is the  $i$ -th observed diffraction intensity,  $y_{x,i}^{\text{Calc}}$  is the diffraction intensity calculated using the physical model with the configuration  $x$ , and  $\omega_i$  be the weight corresponding to the inverse of the uncertainty of  $i$ -th intensity.  $N_{\text{obs}}$  is the number of data points of observed XRD pattern, and  $p$  is the number of variables in the fitting model.

**Table S2** TEM-EDS elemental composition

|           | <b>ZAB</b>            |                     | <b>ZAB<sub>0.2</sub></b> |                     |
|-----------|-----------------------|---------------------|--------------------------|---------------------|
|           | <b>Atomic Percent</b> | <b>Mass Percent</b> | <b>Atomic Percent</b>    | <b>Mass Percent</b> |
| <b>Zn</b> | 7.34                  | 20.31               | 5.47                     | 15.87               |
| <b>Al</b> | 36.67                 | 41.82               | 31.22                    | 37.38               |
| <b>Bi</b> | -                     | -                   | 0.21                     | 1.95                |
| <b>O</b>  | 55.99                 | 37.87               | 63.11                    | 44.81               |

**Table S3** Comparison of wear parameters of the host matrix and tuned coating

| sample              | Wear rate, k<br>( $\times 10^{-5}$ mm <sup>3</sup> /Nm) | COF  | Vickers Hardness (HV) |
|---------------------|---------------------------------------------------------|------|-----------------------|
| NiP                 | 12.736                                                  | 0.93 | 116                   |
| ZA                  | 7.407                                                   | 0.72 | 122                   |
| ZAB <sub>0.05</sub> | 5.323                                                   | 0.61 | 145                   |
| ZAB <sub>0.1</sub>  | 2.762                                                   | 0.42 | 188                   |
| ZAB <sub>0.2</sub>  | 0.889                                                   | 0.19 | 191                   |
| ZAB <sub>0.5</sub>  | 6.674                                                   | 0.70 | 126                   |

**Table S4** Comparative table with other wear resistant materials

| Material                               | Wear rate                                                    | COF  | Load | Year ref           |
|----------------------------------------|--------------------------------------------------------------|------|------|--------------------|
| Ni-P-Cr <sub>3</sub> C <sub>2</sub>    | -                                                            | 0.24 | 20 N | 2024 <sup>7</sup>  |
| Ni-P-8YSZ                              | $5.51 \pm 0.64 (\times 10^{-6} \text{mm}^3/\text{Nm})$       | 0.40 | -    | 2022 <sup>8</sup>  |
| NiP + PTFE                             | $4.76 \times 10^{-8} \text{mm}^3/\text{N m}$                 | 0.83 | -    | 2005 <sup>9</sup>  |
| 5MAAF                                  | $5.4 \times 10^{-6} \text{mm}^3 \text{N}^{-1} \text{m}^{-1}$ | 0.39 | -    | 2026 <sup>10</sup> |
| Cr-Fe-Al <sub>2</sub> O <sub>3</sub>   | $1.8 \times 10^{-6} \text{mm}^3/\text{N m}$                  | 0.83 | -    | 2024 <sup>11</sup> |
| h-BN/TiO <sub>2</sub> -WO <sub>3</sub> | $4.29 \times 10^{-5} \text{mm}^3/\text{Nm}$                  | 0.12 | 1 N  | 2025 <sup>12</sup> |
| Ni-W-B/P-VC                            | $9.578 \times 10^{-8} \text{mm}^2/\text{Nm}$                 | 0.27 | -    | 2024 <sup>13</sup> |
| TiAlMoN                                | $0.849 \times 10^{-6} \text{mm}^3/\text{Nm}$                 | -    | -    | 2024 <sup>14</sup> |
| Ni-B-0.5Gr                             | $7.04 \times 10^{-5} \text{mm}^3/\text{Nm}$                  | 1.15 | -    | 2024 <sup>15</sup> |
| ZAB <sub>0.2</sub>                     | $0.889 \times 10^{-5} \text{mm}^3/\text{Nm}$                 | 0.19 | 20 N | Present work       |



## References

- (1) G. Dasi, T. Lavanya, S. Suneetha, S. Vijayakumar, J.-J. Shim and K. Thangaraju, *Spectrochim. Acta, Part A*, 2022, 265, 120377.
- (2) M. Jain, Manju, R. Kumar, S. O. Won, K. H. Chae, A. Vij and A. Thakur, *Sci. Rep.*, 2020, 10, 385.
- (3) Y. Wan, H. Zhou, M. Zheng, Z.-H. Huang, F. Kang, J. Li and R. Lv, *Adv. Funct. Mater.*, 2021, 31, 2100300.
- (4) Z. Yu, P. R. Cantwell, Q. Gao, D. Yin, Y. Zhang, N. Zhou, M. P. Harmer et al., *Science*, 2017, 358, 97–101.
- (5) S R. Schweinfest, A. T. Paxton and M. W. Finnis, *Nature*, 2004, 432, 1008–1011.
- (6) Pablo, G. R., van den Nieuwenhuijzen Karin, J. H., Walter, L., & ten Elshof Johan, E. (2016).
- (7) Q. Chen, S. Xu, Y. He, S. Yan, Y. Fan, Z. Li, H. Zhou, H. Li, K. Wei, X. Gong and X. Cheng, *Langmuir*, 2024, 40, 16400–16418.
- (8) Y. He, S. Zhang, Y. He, R. Song, Z. Zhang, B. Liu, H. Li and J. Shangguan, *Colloids Surf., A*, 2022, 654, 130059.
- (9) A. Ramalho and J. C. Miranda, *Wear*, 2005, 259, 828–834.
- (10) K. Yu, Q. Cheng, J. Cheng, Y. Geng, S. Zhu, K. Zhang, S. Wan and J. Yang, *J. Mater. Sci. Technol.*, 2026, 247, 14–28.
- (11) A. A. Burkov, M. A. Kulik, A. Yu. Bytsura and M. A. Ermakov, *J. Frict. Wear*, 2023, 44, 346–353.
- (12) Z. Li, Y. Wang, B. Wang, L. Zhao and M. Yuan, *Langmuir*, 2025, 41, 18081–18091.
- (13) X. Gong, Y. He, L. Yan, H. Zhou, Y. He, K. Wei, Q. Chen and S. Xu, *Langmuir*, 2024, 40, 11670–11683.
- (14) A. Belgroune, L. Aissani, A. Alhussein, M. Zaabat, A. Obrosof and S. Rtimi, *ACS Appl. Eng. Mater.*, 2024, 2, 345–359.
- (15) V. Niksefat and F. Mahboubi, *Tribol. Int.*, 2024, 198, 109905.
